# Supplementary material for: Self-assembled binary colloidal crystal monolayers as cell culture substrates
Source: Royal Society of Chemistry journal article supplement (doi:10.1039/c4tb02006e), 2015-01-01
Supplement: c4tb02006e1.pdf [file c4tb02006e1.pdf]

## Supporting Information

### Self-assembled binary colloidal crystal layers as cell culture substrates

*Peng-Yuan Wang, Hitesh Pingle, Peter Koegler, Helmut Thissen, and Peter Kingshott\**

Dr. P.-Y. Wang, Mr. H. Pingle, Mr. P. Koegler, Prof. P. Kingshott

Industrial Research Institute Swinburne (IRIS), and Department of Chemistry and  
Biotechnology, Swinburne University of Technology

Hawthorn, 3122 VIC, Australia

E-mail: [pkingshott@swin.edu.au](mailto:pkingshott@swin.edu.au)

Dr. P.-Y. Wang, Mr. P. Koegler, Dr. H. Thissen

CSIRO Manufacturing Flagship

Bayview Avenue

Clayton, 3168 VIC, Australia

**Equation S1. Volume calculation of colloidal suspensions needed for a BCC layer (one layer of the large particles is assumed).**

$$V = \frac{A_p \times \rho \times V_p \times 0.95}{A_o \times w\%} \quad (1)$$

V = the final volume of the particle solution ( $\mu\text{L}$ ).  $A_p$  = Projection area of particle ( $\text{cm}^2$ ).  $\rho$  = density of particle ( $\text{g}/\text{cm}^3$ ).  $A_o$  = inside area of O-ring ( $\text{cm}^2$ ).  $w\%$  = weight percentage of particle solution ( $\text{g}/\text{cm}^3$ ).  $V_p$  = volume of particle ( $\text{cm}^3$ ).

**Table S1. A list of the different size combination in critical window of BCCs.** All selected particles are stable particles with zeta potentials  $> |\pm 30 \text{ mV}|$  and all combination have size ratios (small/large)  $< 0.2$ . It should be noted that BCC structure also can be found occasionally for size ratios  $> 0.2$ , but with small surface coverage. Surface coverage and BCC structure coverage were classified as high ( $> 70\%$ ), medium ( $70\%-40\%$ ), and low ( $< 40\%$ ). Combinations with both high surface coverage and high BCC structure coverage were eventually selected as cell culture substrates. To be noted, combination outside the window doesn't show in this table.

| No. | Large Particle | $\mu\text{m}$ | Small Particle | $\mu\text{m}$ | Size ratio | Surface Coverage | BCC structure |
|-----|----------------|---------------|----------------|---------------|------------|------------------|---------------|
| 1   | Si             | 5             | PMMA           | 1             | 0.200      | high             | no            |
| 2   | Si             | 5             | PMMA           | 0.4           | 0.080      | high             | high          |
| 3   | Si             | 5             | PSC            | 1             | 0.200      | high             | medium        |
| 4   | Si             | 5             | PSC            | 0.82          | 0.164      | high             | low           |
| 5   | Si             | 5             | PSC            | 0.75          | 0.150      | high             | low           |
| 6   | Si             | 5             | PSC            | 0.51          | 0.102      | high             | high          |
| 7   | Si             | 5             | PSC            | 0.4           | 0.080      | high             | high          |
| 8   | Si             | 5             | PSC            | 0.22          | 0.044      | high             | high          |
| 9   | Si             | 5             | PSC            | 0.093         | 0.019      | high             | high          |
| 10  | Si             | 5             | PSC            | 0.06          | 0.012      | high             | high          |
| 11  | Si             | 5             | PSC            | 0.024         | 0.005      | high             | low           |
| 12  | Si             | 5             | Si             | 0.6           | 0.120      | high             | no            |
| 13  | Si             | 5             | Si             | 0.31          | 0.062      | high             | low           |
| 14  | PSC            | 3             | PSC            | 0.51          | 0.170      | high             | low           |
| 15  | PSC            | 3             | PMMA           | 0.4           | 0.133      | high             | medium        |
| 16  | PSC            | 3             | PSC            | 0.4           | 0.133      | high             | medium        |
| 17  | PSC            | 3             | PSC            | 0.22          | 0.073      | high             | medium        |
| 18  | PSC            | 3             | PSC            | 0.093         | 0.031      | high             | medium        |
| 19  | PSC            | 3             | PSC            | 0.06          | 0.020      | medium           | low           |
| 20  | PSC            | 3             | PSC            | 0.024         | 0.008      | medium           | low           |
| 21  | PSC            | 3             | Si             | 0.6           | 0.200      | high             | no            |
| 22  | PSC            | 3             | Si             | 0.31          | 0.103      | high             | low           |
| 23  | PSC            | 2             | PMMA           | 0.4           | 0.200      | high             | medium        |
| 24  | PSC            | 2             | PSC            | 0.4           | 0.200      | medium           | low           |
| 25  | PSC            | 2             | PSC            | 0.22          | 0.110      | high             | low           |
| 26  | PSC            | 2             | PSC            | 0.093         | 0.047      | high             | low           |
| 27  | PSC            | 2             | PSC            | 0.06          | 0.030      | medium           | low           |
| 28  | PSC            | 2             | Si             | 0.3           | 0.150      | high             | low           |
| 29  | PSC            | 2             | PSC            | 0.024         | 0.012      | high             | low           |
| 30  | PSS            | 2             | PMMA           | 0.4           | 0.200      | high             | no            |
| 31  | PSS            | 2             | PSC            | 0.4           | 0.200      | high             | low           |
| 32  | PSS            | 2             | PSC            | 0.22          | 0.110      | high             | low           |
| 33  | PSS            | 2             | PSC            | 0.093         | 0.047      | high             | low           |
| 34  | PSS            | 2             | PSC            | 0.06          | 0.030      | high             | medium        |
| 35  | PSS            | 2             | PSC            | 0.024         | 0.012      | high             | no            |
| 36  | PSS            | 2             | Si             | 0.3           | 0.150      | high             | no            |
| 37  | Si             | 2             | PSC            | 0.4           | 0.200      | high             | low           |
| 38  | Si             | 2             | PMMA           | 0.4           | 0.200      | high             | low           |
| 39  | Si             | 2             | PSC            | 0.22          | 0.110      | high             | high          |
| 40  | Si             | 2             | PSC            | 0.093         | 0.047      | high             | high          |
| 41  | Si             | 2             | PSC            | 0.06          | 0.030      | high             | medium        |
| 42  | Si             | 2             | PSC            | 0.024         | 0.012      | high             | medium        |
| 43  | Si             | 2             | Si             | 0.3           | 0.150      | high             | low           |
| 44  | PMMA           | 1             | PSC            | 0.093         | 0.093      | medium           | low           |
| 45  | PMMA           | 1             | PSC            | 0.06          | 0.060      | high             | no            |
| 46  | PMMA           | 1             | PSC            | 0.024         | 0.024      | medium           | no            |
| 47  | PSC            | 1             | PSC            | 0.093         | 0.093      | high             | low           |
| 48  | PSC            | 1             | PSC            | 0.06          | 0.060      | high             | low           |
| 49  | PSC            | 1             | PSC            | 0.024         | 0.024      | low              | low           |

**Table S2.** A list of 24 colloidal particles. The particle size, supplier and catalogue number of each particle are listed. PSC: carboxylated polystyrene; PSN: aminated polystyrene; PMMA: polymethyl methacrylate; SiC: carboxylated silicon; SiN: aminated polystyrene; PSS: sulphated polystyrene.

| #  | Colloid   | Diameter            | Supplier    | Cat. #      |
|----|-----------|---------------------|-------------|-------------|
| 1  | PSC 3     | 3 $\mu\text{m}$     | Polyscience | 19819-1     |
| 2  | PSC 2     | 2 $\mu\text{m}$     | Invitrogen  | C37278      |
| 3  | PSC 1     | 1 $\mu\text{m}$     | Polyscience | 19819-1     |
| 4  | PSC 0.8   | 0.82 $\mu\text{m}$  | Bang Lab    | PCO3N/10129 |
| 5  | PSC 0.75  | 0.75 $\mu\text{m}$  | Polyscience | 19819-1     |
| 6  | PSC 0.5   | 0.51 $\mu\text{m}$  | Bang Lab    | PCO3N/11085 |
| 7  | PSC 0.4   | 0.4 $\mu\text{m}$   | Invitrogen  | C37268      |
| 8  | PSC 0.2   | 0.22 $\mu\text{m}$  | Bang Lab    | PCO2N       |
| 9  | PSC 0.093 | 0.093 $\mu\text{m}$ | Bang Lab    | PCO2N/7576  |
| 10 | PSC 0.06  | 0.06 $\mu\text{m}$  | Invitrogen  | C37263      |
| 11 | PSC 0.024 | 0.024 $\mu\text{m}$ | Bang Lab    | PCO2N/9928  |
| 12 | PSN 2     | 2 $\mu\text{m}$     | Invitrogen  | A37366      |
| 13 | PSN 0.4   | 0.4 $\mu\text{m}$   | Invitrogen  | A37358      |
| 14 | PSN 0.2   | 0.18 $\mu\text{m}$  | Bang Lab    | PA02N/9328  |
| 15 | PSN 0.06  | 0.06 $\mu\text{m}$  | Invitrogen  | A37353      |
| 16 | PSS 2     | 2 $\mu\text{m}$     | Polyscience | 19405-10    |
| 17 | PMMA 1    | 1.1 $\mu\text{m}$   | Bang Lab    | PP04N/10710 |
| 18 | PMMA 0.4  | 0.4 $\mu\text{m}$   | Bang Lab    | PP02N/9861  |
| 19 | Si 5      | 5 $\mu\text{m}$     | Bang Lab    | SS06N       |
| 20 | Si 2      | 2.01 $\mu\text{m}$  | Bang Lab    | SS04N/7829  |
| 21 | Si 0.6    | 0.6 $\mu\text{m}$   | Bang Lab    | SSO3N/5688  |
| 22 | Si 0.3    | 0.31 $\mu\text{m}$  | Bang Lab    | SSO2N/9959  |
| 23 | SiC 2     | 2 $\mu\text{m}$     | Bang Lab    | SC04N/9395  |
| 24 | SiN 1     | 1 $\mu\text{m}$     | Bang Lab    | SA04N/9083  |

A

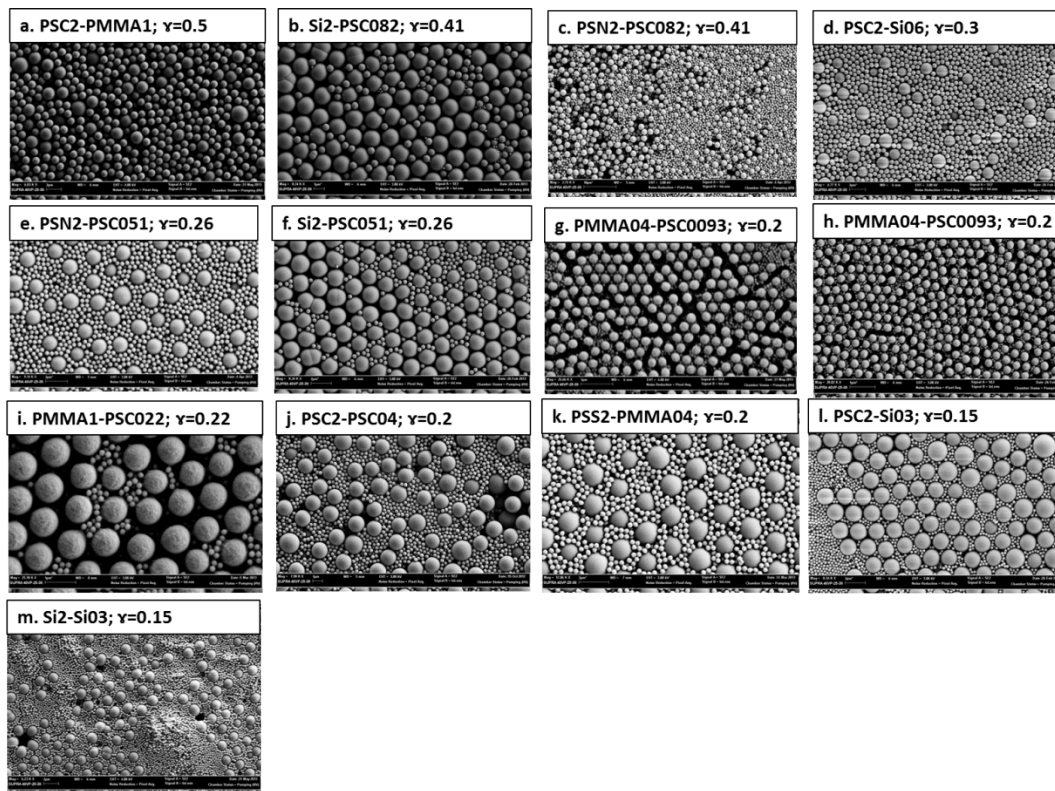

B

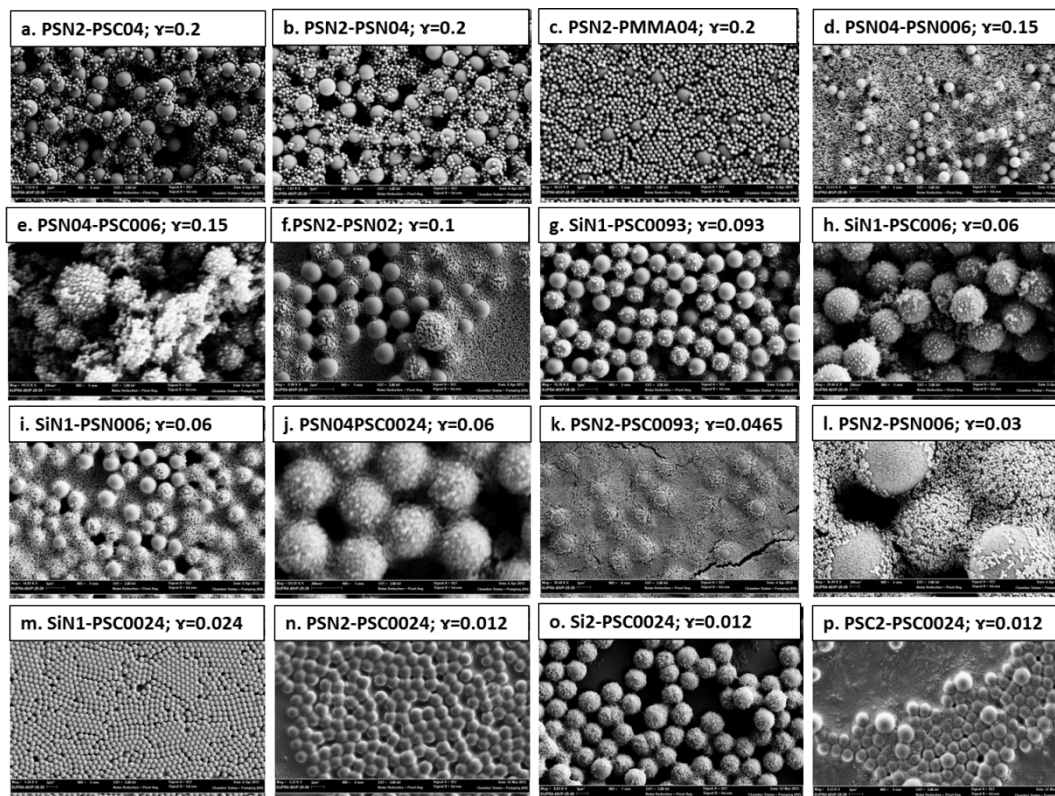

**Figure S1.** Binary colloidal crystal assemblies with (A) disordered structures and (B) small particle adsorption onto larger particles. Selected images showed different size ratios ( $\gamma$ ) ranging 0.15-0.5 for disordered structures and 0.012-0.2 for particle adsorption. In each case, the sample description indicates the large particle/small particle type and size (micron) used and also provides the particle size ratio ( $\gamma$ ). PSC: carboxylated polystyrene; PSN: aminated polystyrene; PSS: sulphated polystyrene; PMMA: polymethyl methacrylate; SiC: carboxylated silica; SiN: aminated silica.

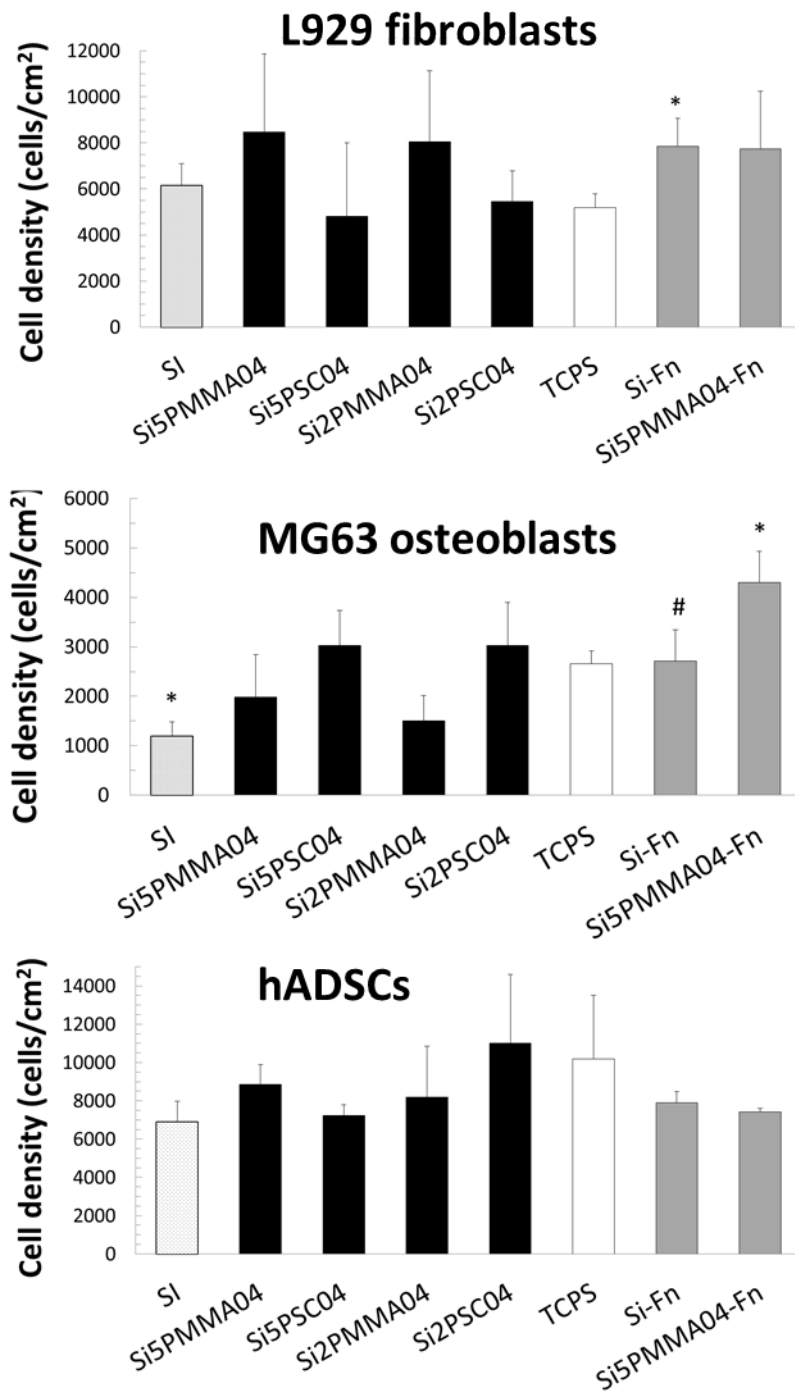

**Figure S2.** Cell attachment density on surfaces after washing. The density of fibroblasts and hADSCs across surfaces was similar, even after FN coating, whilst the density of osteoblasts was dependent on the topography and chemistry of the substrates used. Values = mean  $\pm$  standard deviation ( $n = 5$ ). \* indicates a significant difference versus TCPS. One, two and three symbols indicate  $p < 0.05$ ,  $0.01$ , and  $0.001$ , respectively.

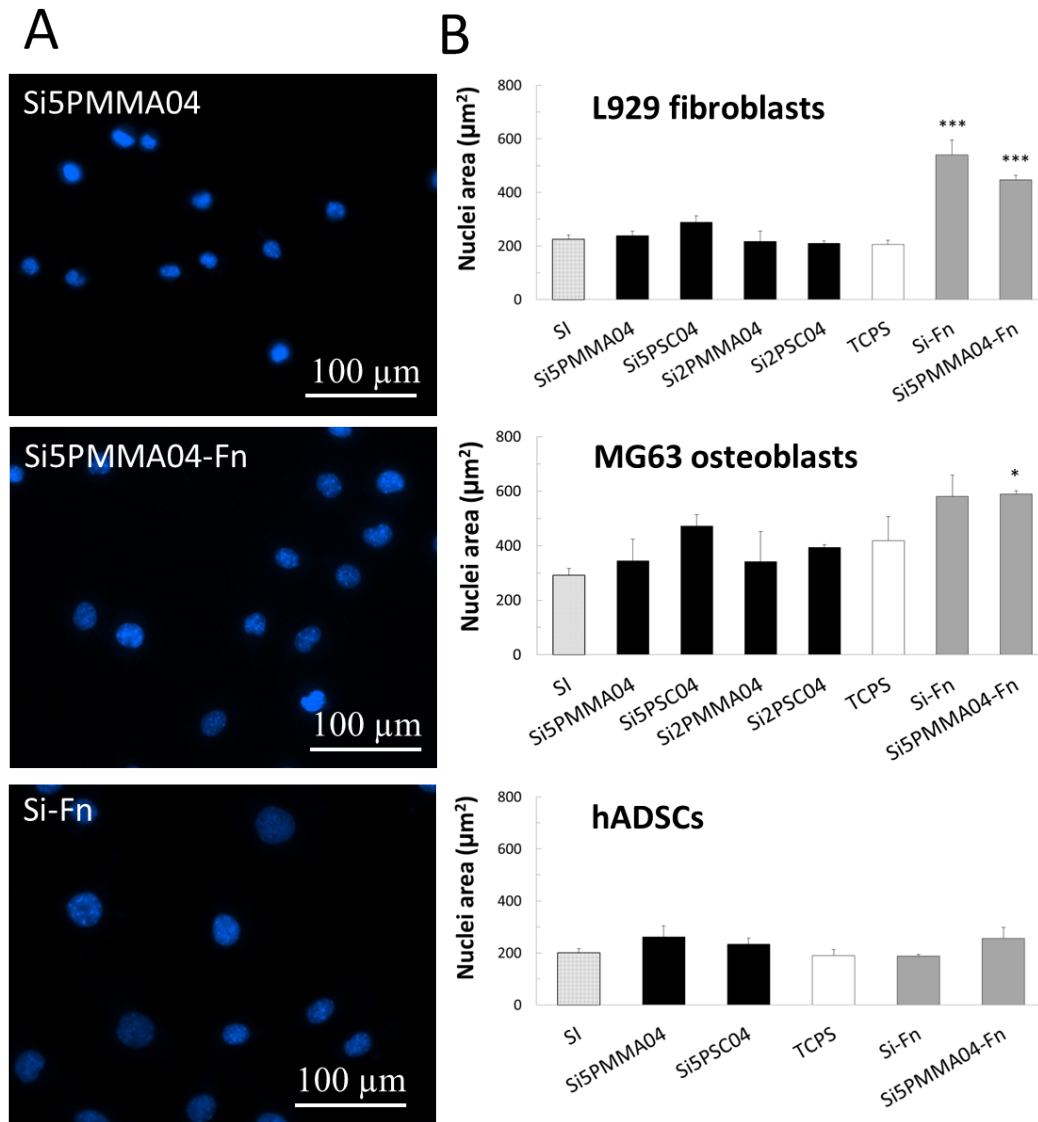

**Figure S3.** The projection area of cell nuclei. (A) Cell nuclei of fibroblasts on different surfaces. The projection area of cell nuclei increased when surfaces were coated with Fn. (B) Statistically, no significant difference was observed between the projection area of cell nuclei of three different cell types on different surfaces before Fn coating. However, after FN coating, the nucleus area of fibroblasts was increased in some cases. Values = mean $\pm$ standard deviation (81-422). \* indicates that there is a significant difference versus TCPS. One, two and three symbols indicate  $p < 0.05$ ,  $0.01$ , and  $0.001$ , respectively.



A. 2  $\mu\text{m}$  PS-COOH

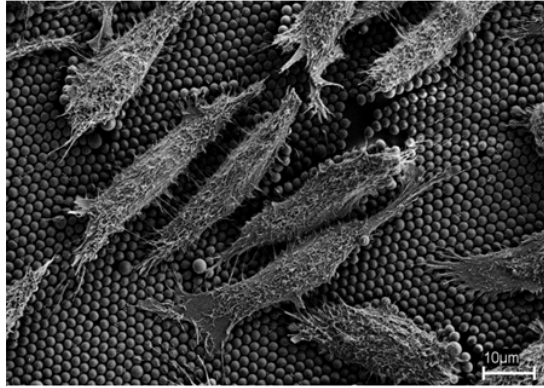

B. 2  $\mu\text{m}$  PS-COOH/400nm PMMA

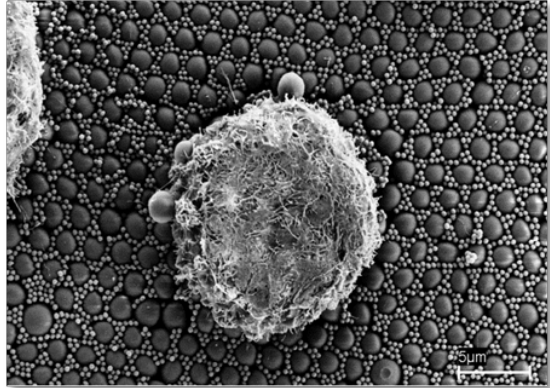

**Figure S4.** The morphology of L929 fibroblast attached to (A) single (SCC) and (B) binary colloidal crystal (BCC) monolayers. Cells were elongated on SCC comprised of 2  $\mu\text{m}$  PS-COOH, while they are rounded on BCC comprised of 2  $\mu\text{m}$  PS-COOH and 400 nm PMMA. Scale bar = 10  $\mu\text{m}$  in A and 5  $\mu\text{m}$  in B.
